# Supplementary material for: A conserved megaprotein-based molecular bridge critical for lipid trafficking and cold resilience
Source: PubMed Central journal article supplement (PMC9649747; doi:10.1038/s41467-022-34450-y), 2022-11-10
Supplement: 41467_2022_34450_MOESM1_ESM.pdf [file 41467_2022_34450_MOESM1_ESM.pdf]

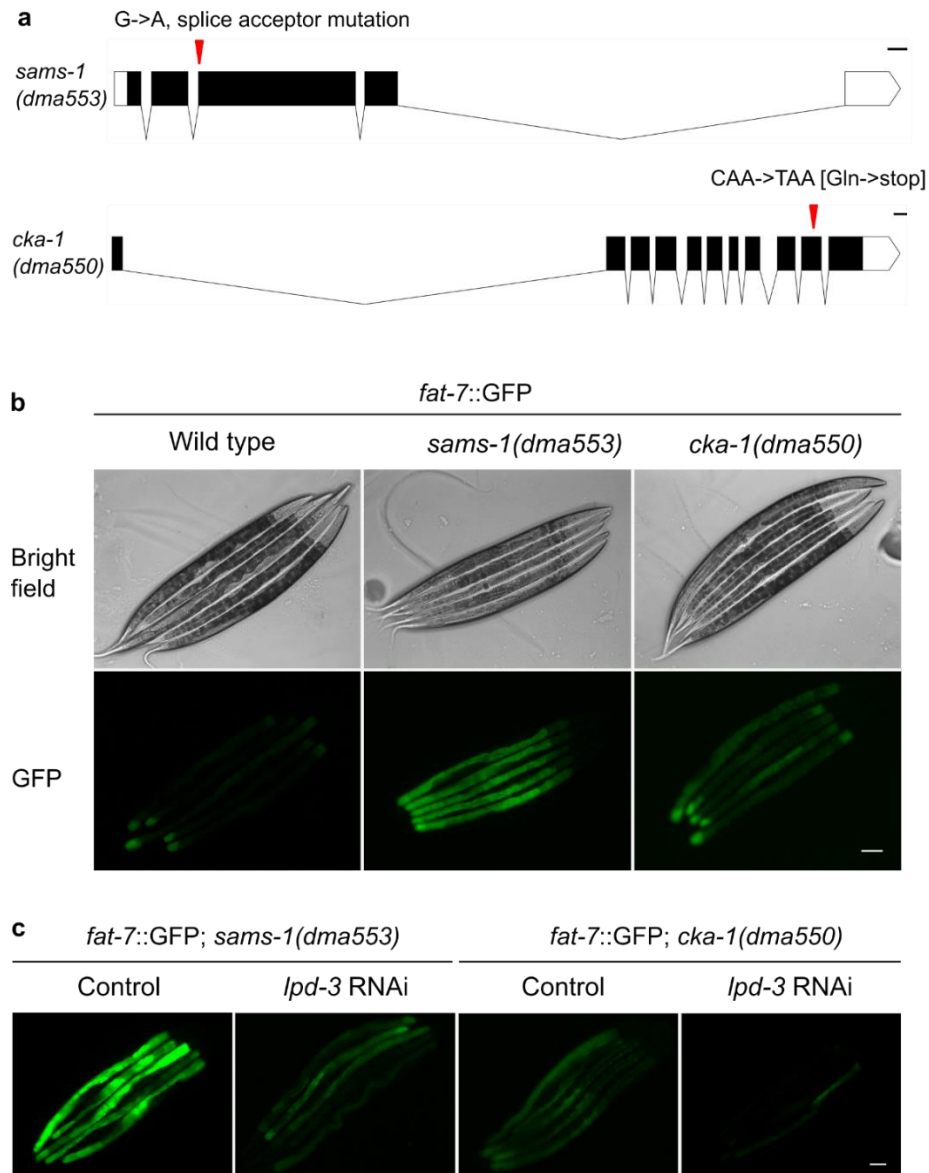

**Supplementary Figure 1. Genetic identification of *cka-1* and *sams-1* in regulating *fat-7::GFP*.** **a**, Gene diagrams showing *sams-1(dma553)* and *cka-1(dma550)* that cause a splice acceptor mutation and a premature stop codon mutation, respectively, identified by WGS. **b**, Representative bright-field and epifluorescence images showing activation of *fat-7::GFP* by *sams-1(dma553)* and *cka-1(dma550)*. Both mutations were isolated from EMS screens and outcrossed at least 5 times, segregating with *fat-7::GFP*

activation phenotypes. **c**, Representative epifluorescence images showing that RNAi against *lpd-3* attenuated activation of *fat-7::GFP* by *sams-1(dma553)* or *cka-1(dma550)*. Scale bar: 50  $\mu$ m.

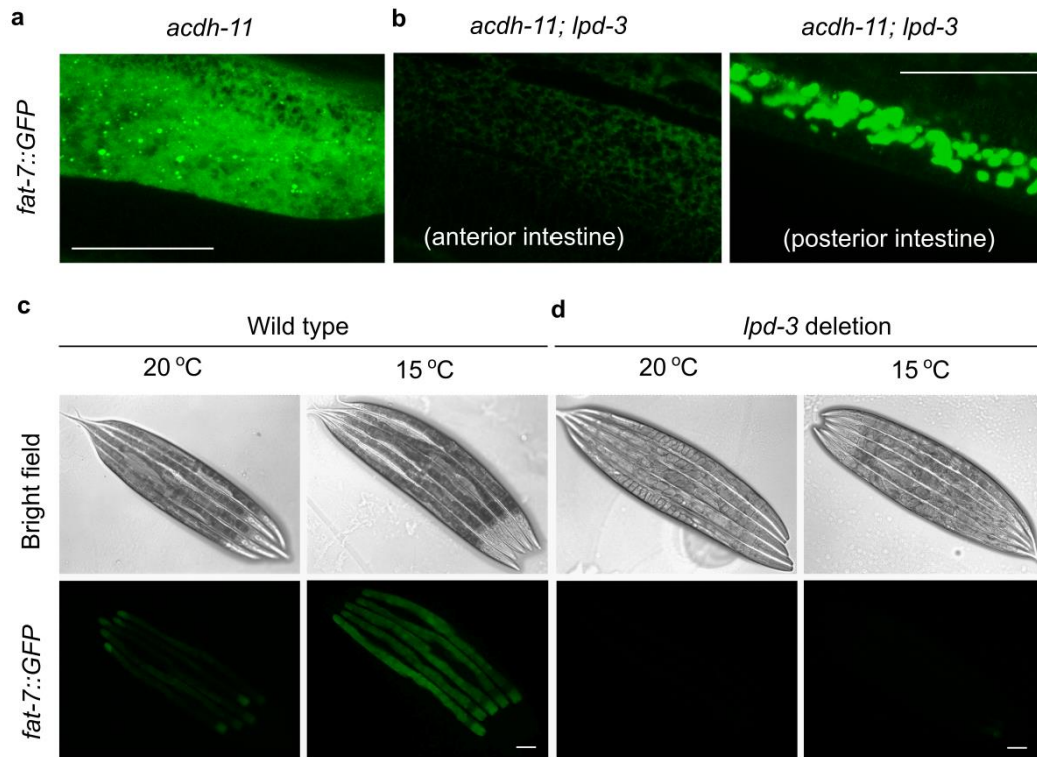

**Supplementary Figure 2. *lpd-3* suppresses *acd-11* or hypothermia-induced *fat-7::GFP*.** **a**, Confocal fluorescence image (Z-stack) showing *fat-7::GFP* in *acd-11(n5857)* mutants. **b**, Confocal fluorescence images showing *lpd-3(ok2138)* deletion mutation suppresses *fat-7::GFP* in *acd-11(n5857)* mutants, more prominently in the anterior than posterior intestine. **c**, Bright field and epifluorescence images showing up-regulation of *fat-7::GFP* by hypothermia (15 °C 24 hrs). **d**, Bright field and epifluorescence images showing up-regulation of *fat-7::GFP* by hypothermia (15 °C 24 hrs) is blocked in *lpd-3(ok2138)* deletion mutants. Scale bar: 50  $\mu$ m.

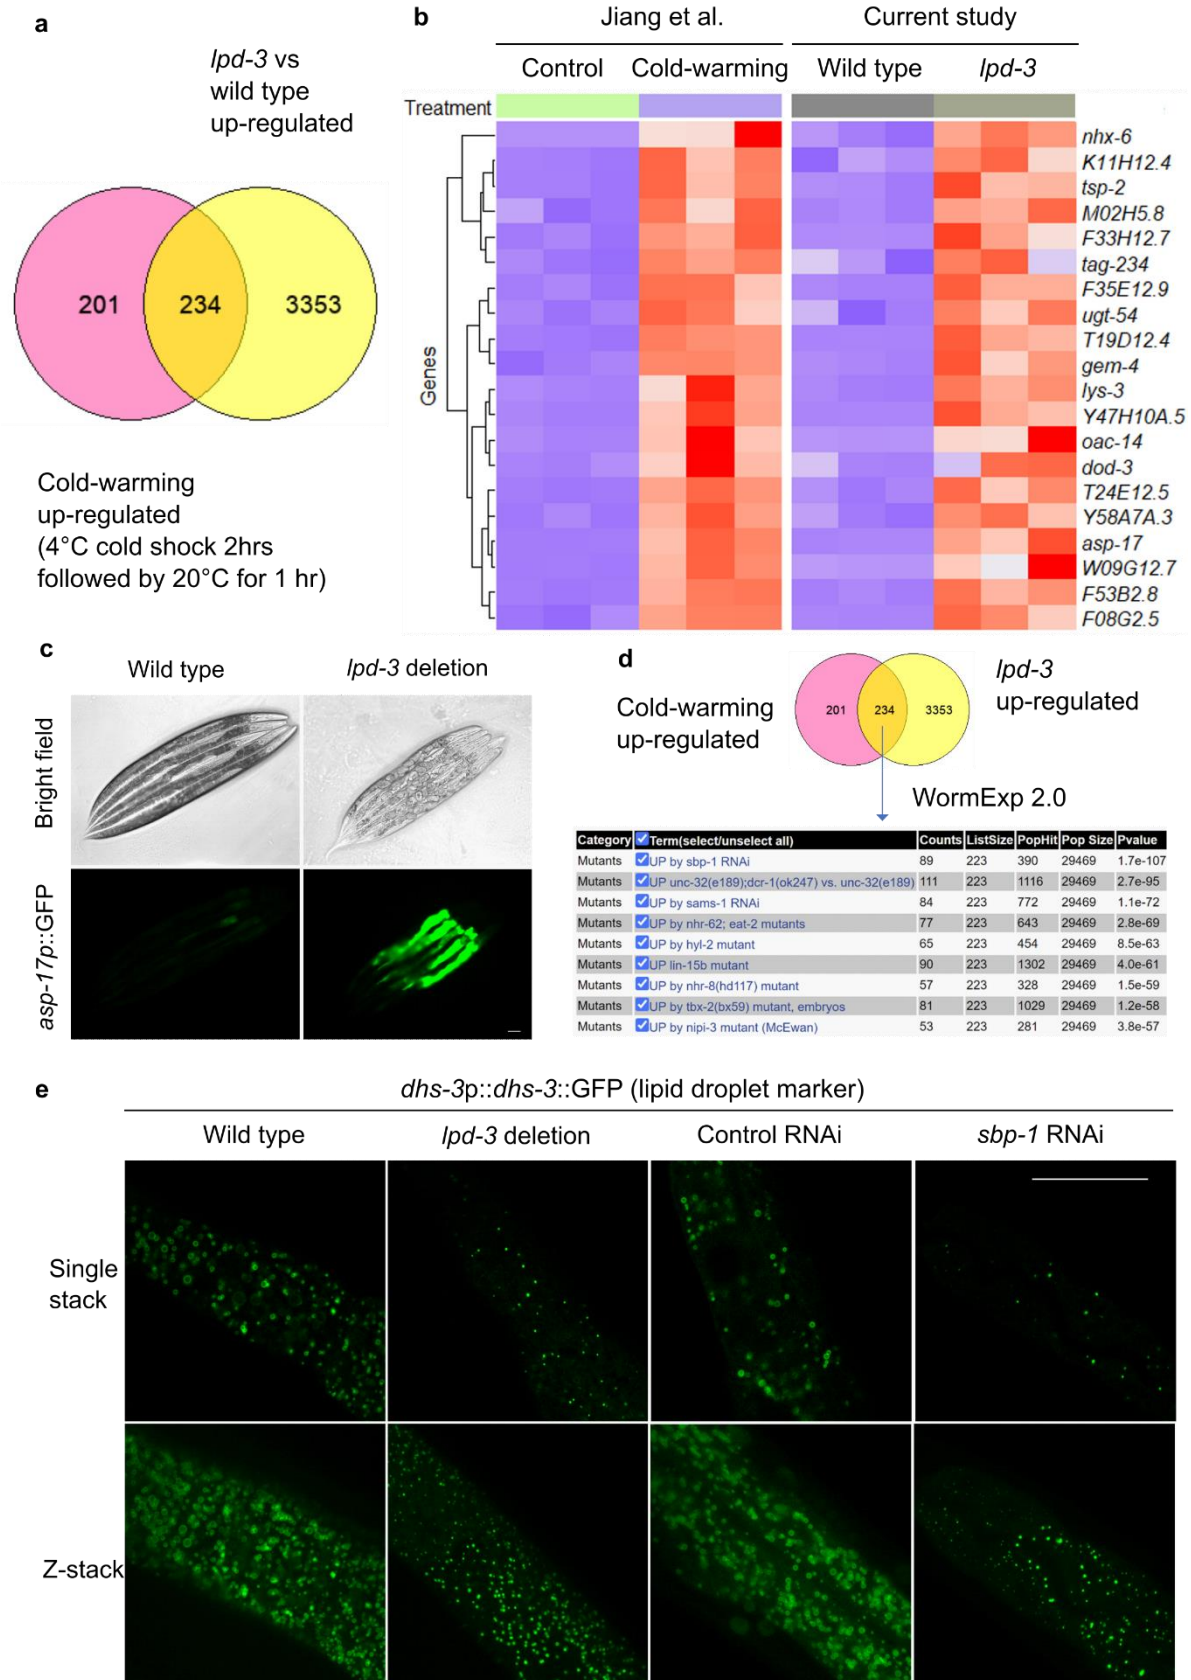

**Supplementary Figure 3. RNAseq reveals genes commonly regulated by LPD-3, cold stress and**

**SBP-1. a,** Venn diagram showing commonly regulated genes by both *lpd-3(ok2138)* and cold stress. **b,**

Heat map showing the top 30 regulated genes by *lpd-3(ok2138)* that are also regulated by cold stress. **c,**

Bright field and epifluorescence images showing constitutive up-regulation of *asp-17p::GFP* in *lpd-*

*3(ok2138)* mutants. Scale bar: 50  $\mu$ m. **d,** WormExp (<https://wormexp.zoologie.uni-kiel.de/wormexp/>)

analysis of *lpd-3* and cold-commonly regulated genes showing they are most similar to the gene set

regulated by RNAi against *sbp-1*. *P* values were calculated by the program EASE based on the Fisher

Exact test by the WormExp webpage. **e,** Representative confocal fluorescence images (Single stack,

above; Z-stack, below) showing that both *lpd-3(ok2138)* and *sbp-1* RNAi can cause fewer in numbers and

smaller in size of lipid droplet makers *dhs-3p::dhs-3::GFP*. Scale bar: 50  $\mu$ m.

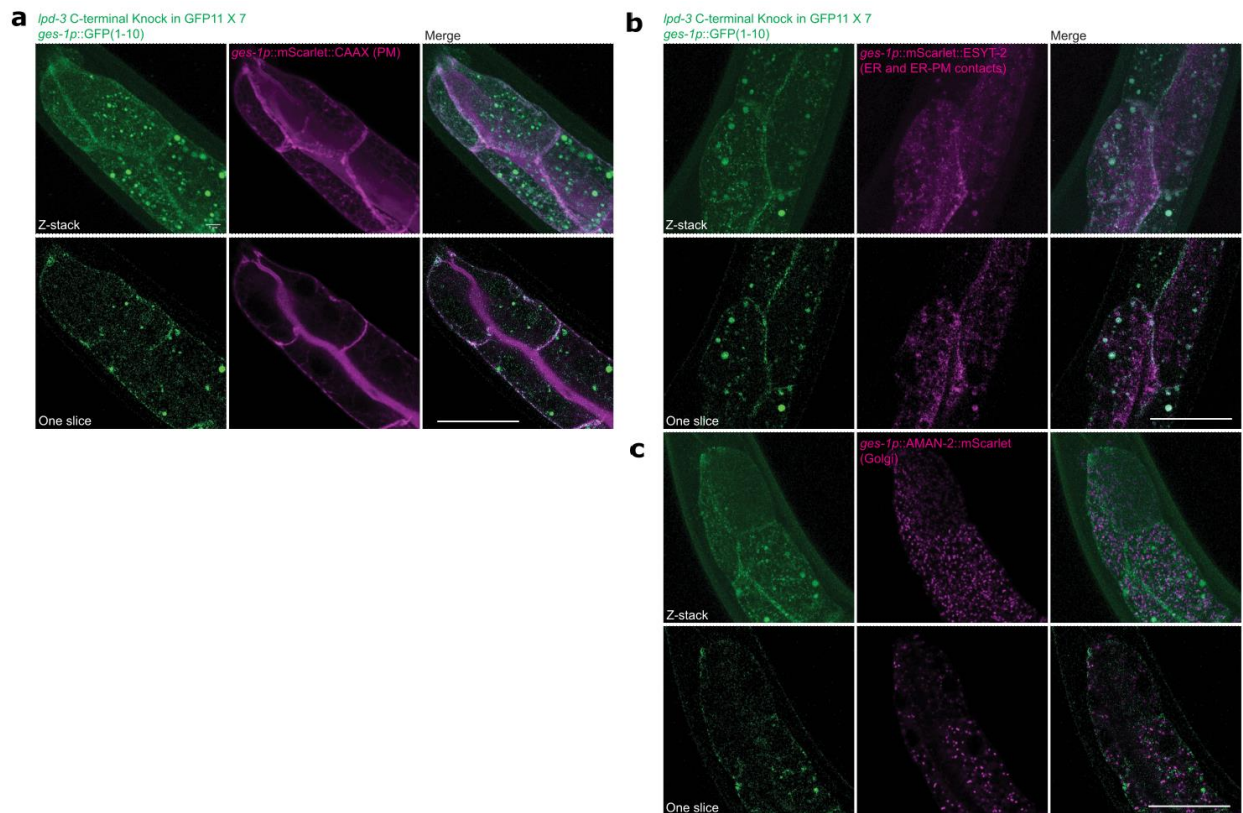

**Supplementary Figure 4. Endogenous LPD-3 localizes to ER-PM membrane contact sites. a,**

Representative confocal fluorescence images showing endogenous LPD-3::GFP (generated by CRISPR/Cas9-mediated knock-in of 7xGFP11 and 7xGFP1-10 complementation) in apposition with mScarlet::CAAX(PM).

**b,** Representative confocal fluorescence images showing endogenous LPD-3::GFP (generated by CRISPR/Cas9-mediated knock-in of GFP11 and 7xGFP1-10 complementation) in apposition with mScarlet::ESYT-2, a marker for ER-PM junctions.

**c,** Representative confocal fluorescence images showing endogenous LPD-3::GFP (generated by CRISPR/Cas9-mediated knock-in of GFP11 and 7xGFP1-10 complementation) in apposition with AMAN-2::mScarlet, a Golgi marker.

Scale bar, 50  $\mu$ m.



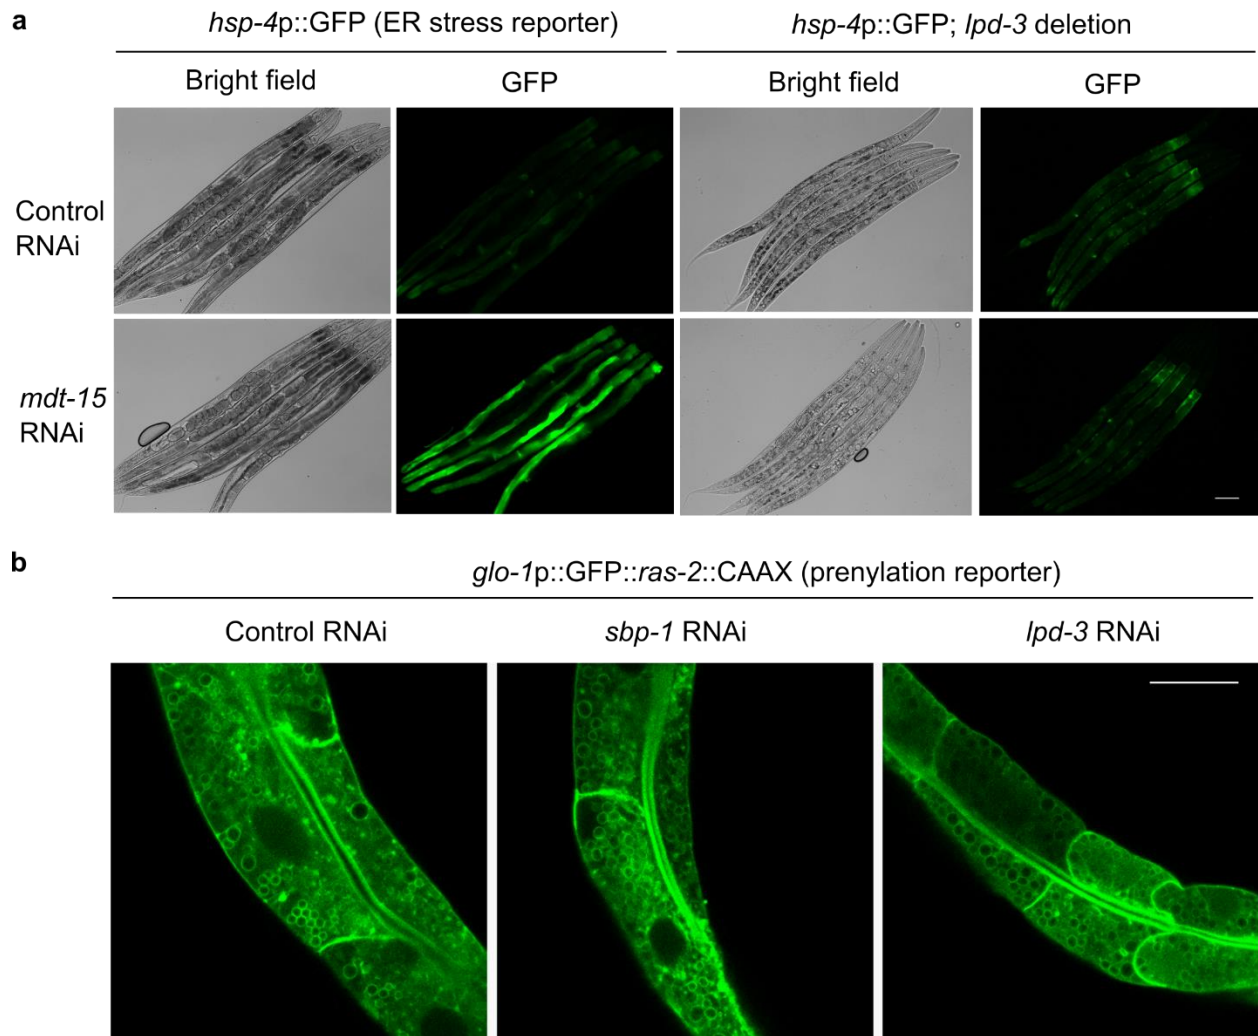

**Supplementary Figure 5. Additional phenotypes of *lpd-3* mutants.** **a**, Representative epifluorescence images showing activation of the *hsp-4p::GFP* ER stress reporter by RNAi against *mdt-15* in wild type but not *lpd-3(ok2138)* mutants. *mdt-15* RNAi activates *hsp-4p::GFP* because of reduced desaturase gene expression and excessive acyl chain saturation of ER membrane lipids<sup>47</sup>. **b**, Representative confocal fluorescence images showing largely normal intestinal PM morphology and PM-targeted trafficking of the prenylation reporter *glo-1p::GFP::ras-2::CAAX* in *sbp-1* or *lpd-3* RNAi-treated animals. Scale bar: 50  $\mu$ m.

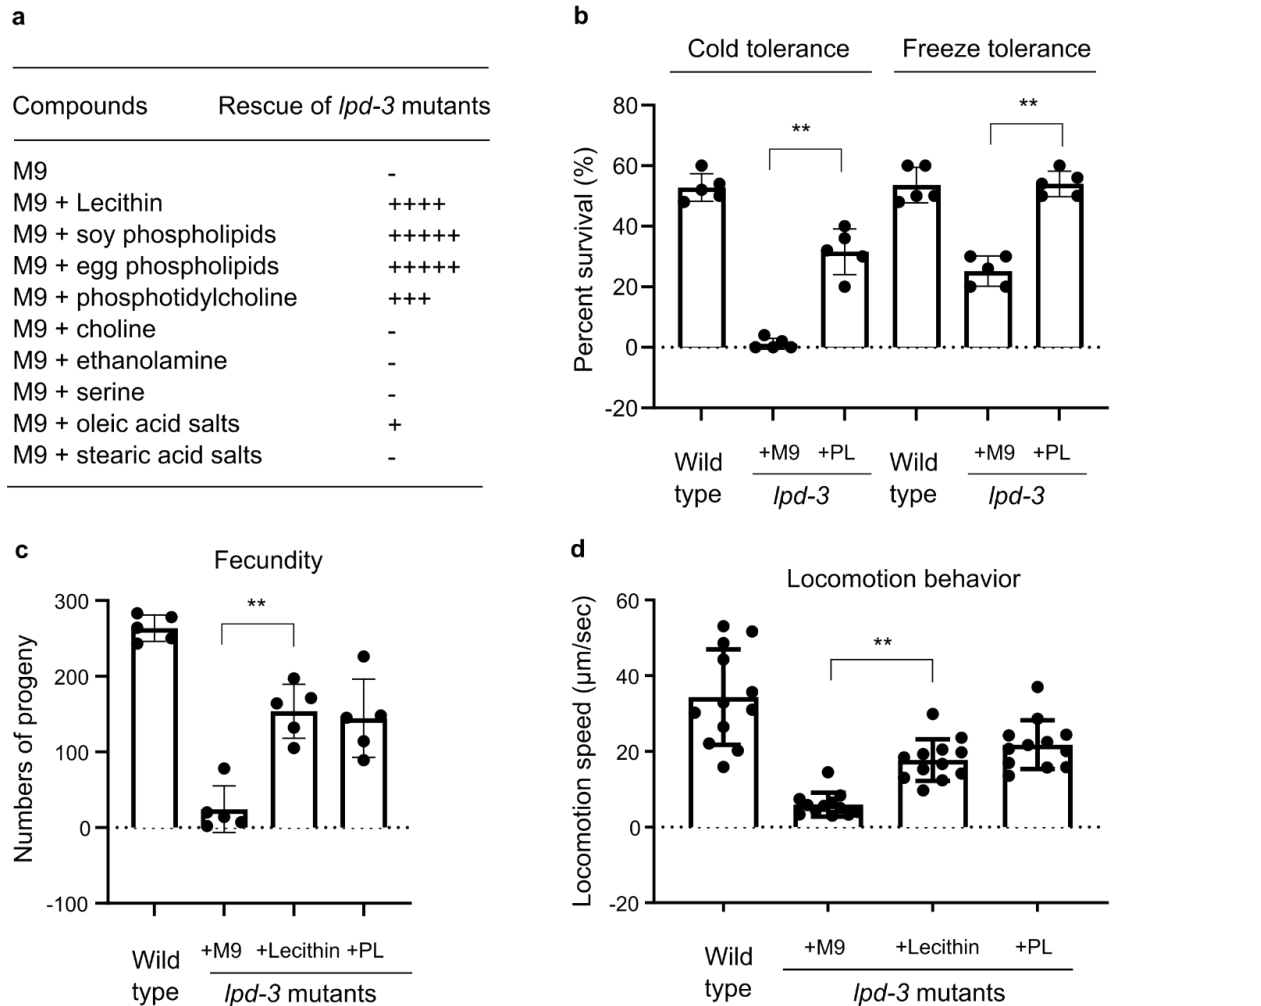

**Supplementary Figure 6. Phospholipid/Lecithin rescue of various *lpd-3* mutant phenotypes.** **a**, Table summary for the degrees of rescue (indicated by the numbers of + sign) of developmental delay in *lpd-3* mutants by Lecithin, phospholipids derived from soy or egg, or various other phospholipid constituent compounds. **b**, Quantification of percent survival of wild type or *lpd-3* mutants, and rescue by soy phospholipid (PL), in the cold or freezing tolerance assays. Values are means  $\pm$  S.D with  $**P < 0.01$  (N = 5 independent experiments, one-way ANOVA followed by multiple two-sided unpaired t-tests). **c**, Quantification of fecundity (numbers of progeny per hermaphrodite) of wild type or *lpd-3* mutants, and rescue by soy phospholipid (PL) or Lecithin. Values are means  $\pm$  S.D with  $**P < 0.01$  (N = 5 independent experiments, one-way ANOVA followed by multiple two-sided unpaired t-tests). **d**, Quantification of locomotion behavior (average speed of young adult hermaphrodite) of wild type or *lpd-3* mutants, and

rescue by soy phospholipid (PL) or Lecithin. Values are means  $\pm$  S.D with  $**P < 0.01$  (N = 12 animals per group, one-way ANOVA followed by multiple two-sided unpaired t-tests). Source data are provided as a Source Data file.

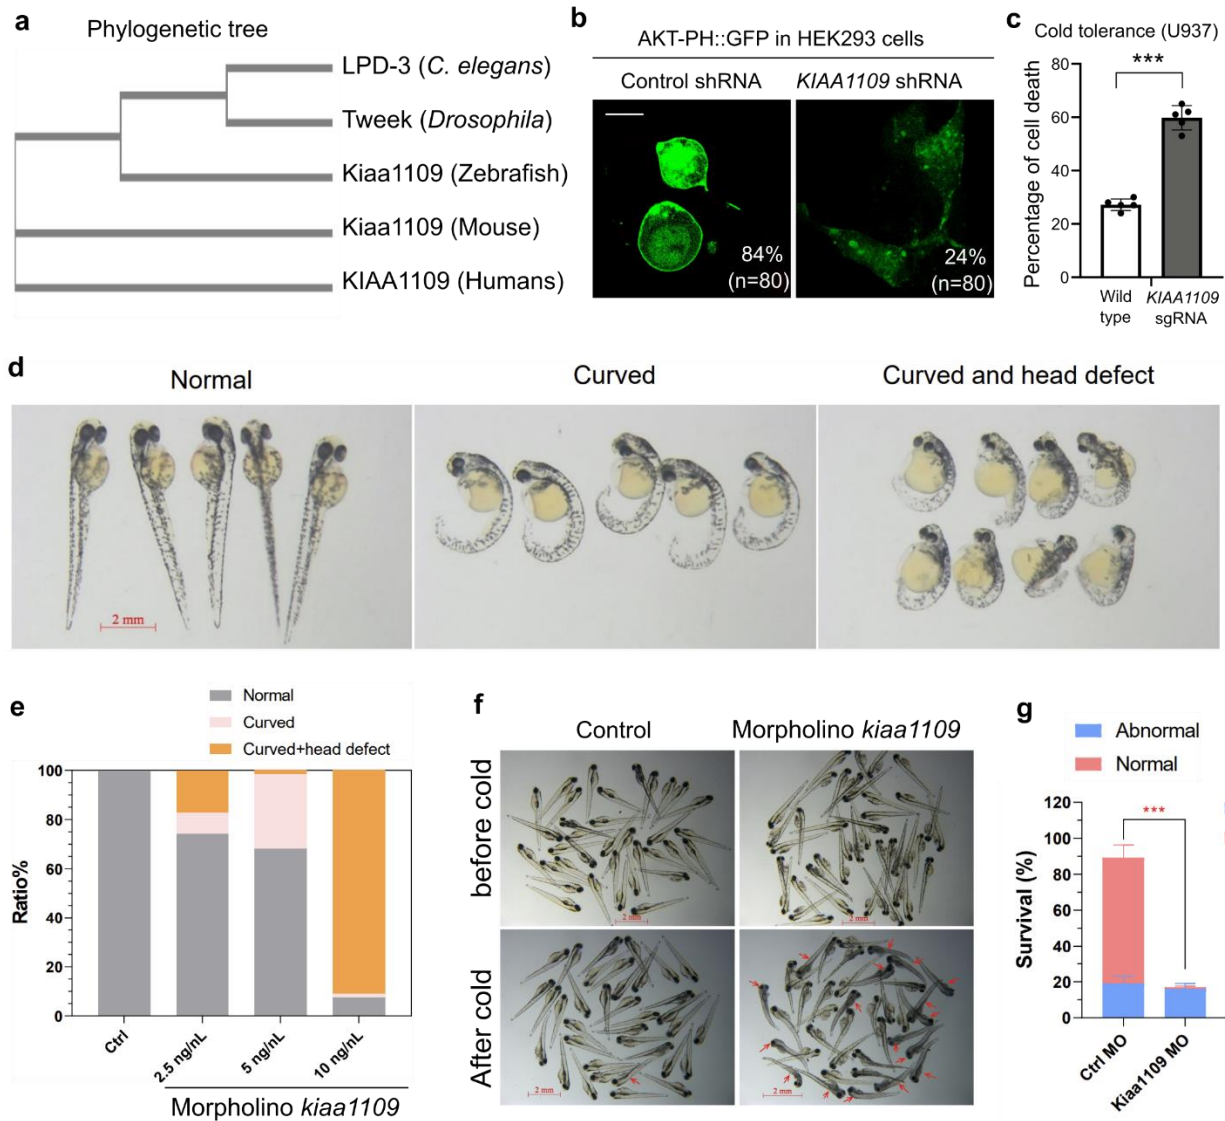

**Supplementary Figure 7. Evidence for conserved roles of LPD-3 protein families in lipid trafficking and cold tolerance.** **a**, Clustal Omega-generated phylogenetic tree of the LPD-3 protein family from major metazoan species (*C. elegans*, *Drosophila*, Zebrafish, mouse and humans). **b**, Representative



confocal fluorescence imaging of AKT-PH::GFP (PIP3 binding) in HEK293 cells co-transfected with the AKT-PH::GFP and shRNA (control or *KIAA1109* with 73% knockdown efficiency, SIGMA) plasmids, showing reduced plasma membrane localization of AKT-PH::GFP by shRNA against *KIAA1109*. Percentages of cells with normal membrane-localized fluorescent signals were noted for shRNA control and sh-*KIAA1109*. Scale bar: 10  $\mu$ m. **c**, Percentage of cell death after cold shock (4 °C for 20 hrs) in wild type and *KIAA1109* KO cells generated by CRISPR/Cas9. Values are means  $\pm$  S.D with \*\*\*,  $P < 0.001$ ; N = 5 independent experiments (n > 400 cells analyzed by SYTOX Green for each experiment). **d**, Representative images of zebrafish embryos showing various morphological phenotypes caused by morpholino against *kiaa1109*. **e**, Quantification of the various morphological phenotypes caused by morpholino against *kiaa1109*. **f**, Representative images of zebrafish embryos showing a phenotype of reduced cell survival caused by morpholino against *kiaa1109*. **g**, Quantification of reduced cell survival caused by morpholino against *kiaa1109*. Values are means  $\pm$  S.D with \*\*\*,  $P < 0.001$ ; N = 6 independent experiments (n > 30 fish for each experiment). Source data are provided as a Source Data file.
