# Supplementary material for: A conserved megaprotein-based molecular bridge critical for lipid trafficking and cold resilience
Source: PubMed Central journal article supplement (PMC9649747; doi:10.1038/s41467-022-34450-y), 2022-11-10
Supplement: 41467_2022_34450_MOESM3_ESM.pdf [file 41467_2022_34450_MOESM3_ESM.pdf]

**File name: Supplementary Data 1**

**Description:** RNAseq identified differentially expressed genes in *lpd-3* mutants.

**File name: Supplementary Data 2**

**Description:** Protein Database Bank (pdb) file for the predicted LPD-3 structure.
